# Supplementary material for: Prediction Model of Coal Gas Permeability Based on Improved DBO Optimized BP Neural Network
Source: MDPI journal article supplement (doi:10.3390/s24092873), 2024-04-30
Supplement: s1 [file s1]

**Coal gas permeability sample data**

| NO. | Effective stress<br>/MPa | Gas pressure<br>/MPa | Temperature<br>/°C | Compressive<br>strength /MPa | Permeability<br>/(10 <sup>-5</sup> m <sup>2</sup> ) |
|-----|--------------------------|----------------------|--------------------|------------------------------|-----------------------------------------------------|
| 1   | 2                        | 1.8                  | 40                 | 10.85                        | 0.881                                               |
| 2   | 1.51                     | 0.5                  | 55                 | 12.85                        | 1.062                                               |
| 3   | 4.01                     | 0.5                  | 30                 | 14.13                        | 0.559                                               |
| 4   | 2.5                      | 0.4                  | 70                 | 12.62                        | 0.631                                               |
| 5   | 4.01                     | 0.5                  | 50                 | 14.13                        | 0.46                                                |
| 6   | 3                        | 1                    | 30                 | 12.85                        | 0.565                                               |
| 7   | 3.62                     | 1                    | 50                 | 11.62                        | 0.479                                               |
| 8   | 2                        | 1                    | 30                 | 12.85                        | 0.81                                                |
| 9   | 3                        | 1                    | 70                 | 11.5                         | 0.451                                               |
| 10  | 1.23                     | 1.5                  | 40                 | 13.5                         | 0.972                                               |
| 11  | 1.95                     | 1.2                  | 40                 | 11.62                        | 0.782                                               |
| 12  | 3.78                     | 0.6                  | 20                 | 12.5                         | 0.617                                               |
| 13  | 3.78                     | 1                    | 70                 | 11.5                         | 0.402                                               |
| 14  | 2.5                      | 1.5                  | 50                 | 12.7                         | 0.54                                                |
| 15  | 1.68                     | 0.7                  | 35                 | 12.85                        | 1.028                                               |
| 16  | 3                        | 0.5                  | 40                 | 10.62                        | 0.791                                               |
| 17  | 1.23                     | 1.5                  | 30                 | 12.37                        | 1.023                                               |
| 18  | 2.64                     | 1.3                  | 65                 | 11.62                        | 0.504                                               |
| 19  | 3                        | 1.7                  | 60                 | 12.37                        | 0.534                                               |
| 20  | 2.5                      | 1                    | 30                 | 12.85                        | 0.656                                               |
| 21  | 2.04                     | 1.6                  | 50                 | 12.85                        | 0.635                                               |
| 22  | 2.5                      | 1                    | 50                 | 11.62                        | 0.588                                               |
| 23  | 2                        | 1.5                  | 30                 | 12.37                        | 0.769                                               |
| 24  | 1.73                     | 1.8                  | 45                 | 14.13                        | 0.805                                               |
| 25  | 2                        | 1                    | 60                 | 12.62                        | 0.633                                               |
| 26  | 2.5                      | 1.5                  | 30                 | 12.37                        | 0.677                                               |
| 27  | 2.5                      | 0.5                  | 30                 | 14.13                        | 0.801                                               |
| 28  | 3                        | 1.2                  | 40                 | 12.5                         | 0.499                                               |
| 29  | 3.29                     | 2                    | 60                 | 11.37                        | 0.775                                               |
| 30  | 3                        | 1.9                  | 55                 | 12.85                        | 0.613                                               |
| 31  | 2.5                      | 0.5                  | 25                 | 14.15                        | 0.863                                               |
| 32  | 2                        | 1.6                  | 60                 | 12.37                        | 0.608                                               |
| 33  | 1.45                     | 1.5                  | 35                 | 14.12                        | 0.955                                               |
| 34  | 1.75                     | 0.5                  | 45                 | 12.37                        | 1.004                                               |
| 35  | 2                        | 1                    | 50                 | 11.62                        | 0.724                                               |
| 36  | 1.83                     | 1.2                  | 55                 | 13.47                        | 0.705                                               |
| 37  | 3                        | 1                    | 50                 | 11.62                        | 0.561                                               |
| 38  | 2                        | 0.5                  | 30                 | 14.13                        | 1.042                                               |
| 39  | 1.48                     | 0.7                  | 30                 | 14.15                        | 1.236                                               |
| 40  | 1.48                     | 1                    | 30                 | 12.85                        | 1.054                                               |

|    |      |     |    |       |       |
|----|------|-----|----|-------|-------|
| 41 | 1.62 | 1   | 50 | 11.62 | 0.891 |
| 42 | 2.5  | 1   | 70 | 11.5  | 0.516 |
| 43 | 3.29 | 1.5 | 30 | 12.37 | 0.619 |
| 44 | 3    | 1.5 | 30 | 12.37 | 0.632 |
| 45 | 2.2  | 1.2 | 70 | 11.5  | 0.564 |
| 46 | 1.45 | 1   | 70 | 11.5  | 0.786 |
| 47 | 3    | 0.5 | 30 | 14.13 | 0.683 |
| 48 | 3.78 | 1   | 30 | 12.85 | 0.491 |
| 49 | 1.73 | 0.5 | 30 | 14.13 | 1.189 |
| 50 | 2    | 1   | 70 | 11.5  | 0.632 |

KPCA dimension reduction data

| NO. | Y1     | Y2     | Y3     | Permeability /(10 <sup>-5</sup> m <sup>2</sup> ) |
|-----|--------|--------|--------|--------------------------------------------------|
| 1   | 0.615  | -0.972 | 1.635  | 0.881                                            |
| 2   | -0.404 | -0.453 | -0.373 | 1.062                                            |
| 3   | -0.497 | 2.050  | -2.133 | 0.559                                            |
| 4   | 0.561  | 0.909  | 0.337  | 0.631                                            |
| 5   | 0.049  | 2.171  | -1.315 | 0.46                                             |
| 6   | -0.278 | 0.596  | -0.840 | 0.565                                            |
| 7   | 1.135  | 1.626  | 0.819  | 0.479                                            |
| 8   | -0.752 | -0.548 | -0.883 | 0.81                                             |
| 9   | 1.442  | 1.057  | 1.689  | 0.451                                            |
| 10  | -1.046 | -1.980 | -0.446 | 0.972                                            |
| 11  | 0.111  | -0.548 | 0.534  | 0.782                                            |
| 12  | -0.098 | 1.890  | -1.376 | 0.617                                            |
| 13  | 1.812  | 1.950  | 1.723  | 0.402                                            |
| 14  | 0.201  | -0.336 | 0.547  | 0.54                                             |
| 15  | -0.828 | -0.581 | -0.987 | 1.028                                            |
| 16  | 0.933  | 1.524  | 0.553  | 0.791                                            |
| 17  | -0.792 | -1.857 | -0.107 | 1.023                                            |
| 18  | 1.139  | 0.292  | 1.684  | 0.504                                            |
| 19  | 0.905  | 0.148  | 1.392  | 0.534                                            |
| 20  | -0.515 | 0.024  | -0.861 | 0.656                                            |
| 21  | -0.066 | -0.988 | 0.526  | 0.635                                            |
| 22  | 0.603  | 0.344  | 0.770  | 0.588                                            |
| 23  | -0.427 | -0.976 | -0.074 | 0.769                                            |
| 24  | -0.906 | -1.783 | -0.342 | 0.805                                            |
| 25  | 0.173  | -0.330 | 0.496  | 0.633                                            |
| 26  | -0.190 | -0.404 | -0.053 | 0.677                                            |
| 27  | -1.213 | 0.322  | -2.199 | 0.801                                            |
| 28  | 0.198  | 0.511  | -0.003 | 0.499                                            |
| 29  | 1.570  | 0.339  | 2.361  | 0.775                                            |
| 30  | 0.586  | -0.162 | 1.067  | 0.613                                            |
| 31  | -1.358 | 0.288  | -2.416 | 0.863                                            |
| 32  | 0.411  | -0.896 | 1.251  | 0.608                                            |
| 33  | -1.367 | -1.859 | -1.051 | 0.955                                            |
| 34  | -0.339 | -0.161 | -0.454 | 1.004                                            |
| 35  | 0.366  | -0.228 | 0.748  | 0.724                                            |
| 36  | -0.399 | -0.895 | -0.081 | 0.705                                            |
| 37  | 0.841  | 0.916  | 0.792  | 0.561                                            |
| 38  | -1.450 | -0.251 | -2.220 | 1.042                                            |
| 39  | -1.665 | -1.051 | -2.060 | 1.236                                            |
| 40  | -0.999 | -1.144 | -0.905 | 1.054                                            |

|    |        |        |        |       |
|----|--------|--------|--------|-------|
| 41 | 0.186  | -0.663 | 0.732  | 0.891 |
| 42 | 1.205  | 0.485  | 1.667  | 0.516 |
| 43 | 0.185  | 0.501  | -0.018 | 0.619 |
| 44 | 0.047  | 0.169  | -0.031 | 0.632 |
| 45 | 1.103  | -0.061 | 1.851  | 0.564 |
| 46 | 0.707  | -0.717 | 1.622  | 0.786 |
| 47 | -0.975 | 0.894  | -2.177 | 0.683 |
| 48 | 0.092  | 1.489  | -0.806 | 0.491 |
| 49 | -1.578 | -0.560 | -2.232 | 1.189 |
| 50 | 0.967  | -0.088 | 1.646  | 0.632 |
